# Supplementary material for: Enhancement of Toxic Efficacy of Alkylated Polycyclic Aromatic Hydrocarbons Transformed by Sphingobium quisquiliarum
Source: MDPI journal article supplement (doi:10.3390/ijerph17176416), 2020-09-03
Supplement: s1 [file s1]

Supplementary Material

# Enhancement of toxic efficacy of alkylated polycyclic aromatic hydrocarbons transformed by *Sphingobium quisquiliarum*

*So-Young Lee and Jung-Hwan Kwon\**

Division of Environmental Science and Ecological Engineering, Korea University, 145

Anam-ro, Seongbuk-gu, Seoul 02841, Republic of Korea

\*Corresponding author:

Phone: +82 2 3290 3041

Fax: +82 2 953 0737

E-mail: junghwankwon@korea.ac.kr

ORCID: 0000-0002-6341-7562

## Contents:

**Figure S1.** Relative peak areas of (a) 3,6-dimethylphenanthrene and generated peak and (b) 1-methylpyrene and generated peak during biodegradation tests.

**Figure S2.** HPLC Chromatograms of (a) 3,6-dimethylphenanthrene, (b) products of biodegradation, (c) the first fractionated metabolic product (36DMPhe\_F1) and (d) the second fractionated metabolic product (36DMPhe\_F2).

**Figure S3.** Three-dimensional scanning of  $\lambda_{em}$  with fixed  $\lambda_{ex}$  of 260 nm (left) and the optimum  $\lambda_{em}$  (right) for (a) 3,6-dimethylphenanthrene and (b) the first fractionated metabolic product (36DMPhe\_F1) and (c) the second fractionated metabolic product (36DMPhe\_F2).

**Figure S4.** HPLC chromatograms of (a) 1-methylpyrene, (b) products of biodegradation, (c)

the fractionated metabolic product (1MP\_F).

**Figure S5.** Three-dimensional scanning of  $\lambda_{em}$  with fixed  $\lambda_{ex}$  of 260 nm (left panel) and the optimum  $\lambda_{em}$  (right panel) for (a) 1-methylpyrene, (b) the fractionated metabolic product (1MP\_F).

**Figure S6.** The mass fragmentation spectrum of the identified metabolic products of (a) 3,6DMPhe\_F1, (b) 3,6DMPhe\_F2, and (c) 1MP\_F with their derivatized structures.

**Figure S7.** The mass fragmentation spectrum of an authentic standard of 1-pyrenemethanol with the derivatized structure.

**Figure S8.** The chemical structures of (a) phenanthrene and (b) pyrene with their carbon numbering.

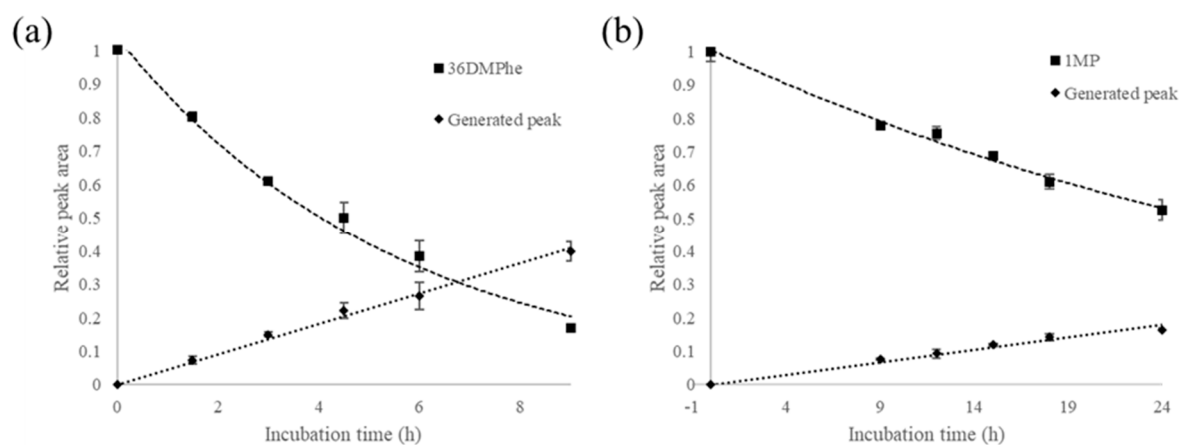

**Figure S1.** Relative peak areas of (a) 3,6-dimethylphenanthrene and generated peak and (b) 1-methylpyrene and generated peak during biodegradation tests.

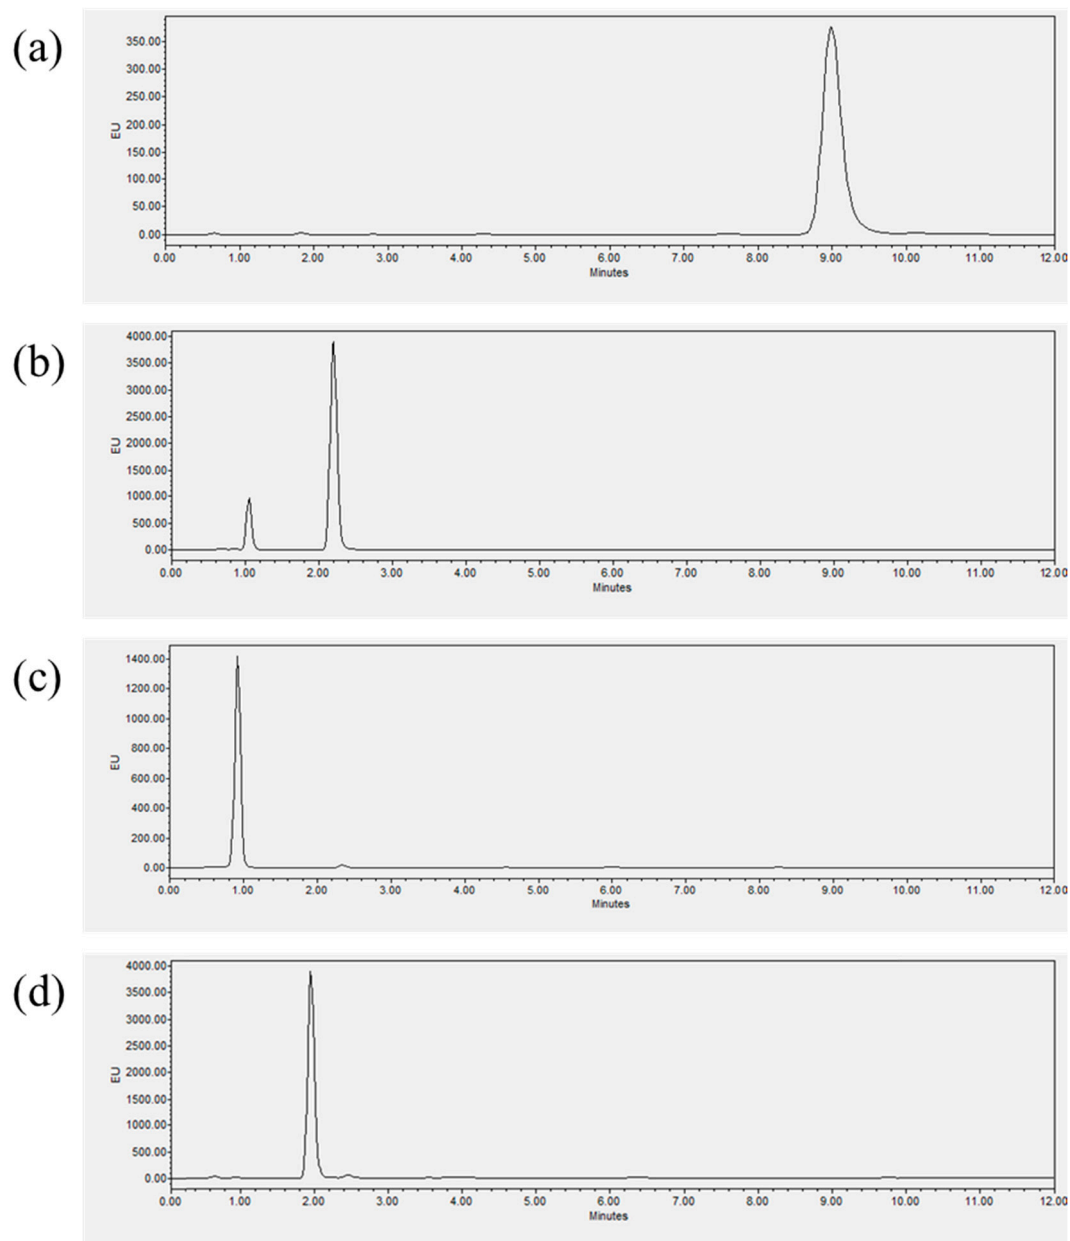

**Figure S2.** HPLC Chromatograms of (a) 3,6-dimethylphenanthrene, (b) products of biodegradation, (c) the first fractionated metabolic product (36DMPhe\_F1) and (d) the second fractionated metabolic product (36DMPhe\_F2).

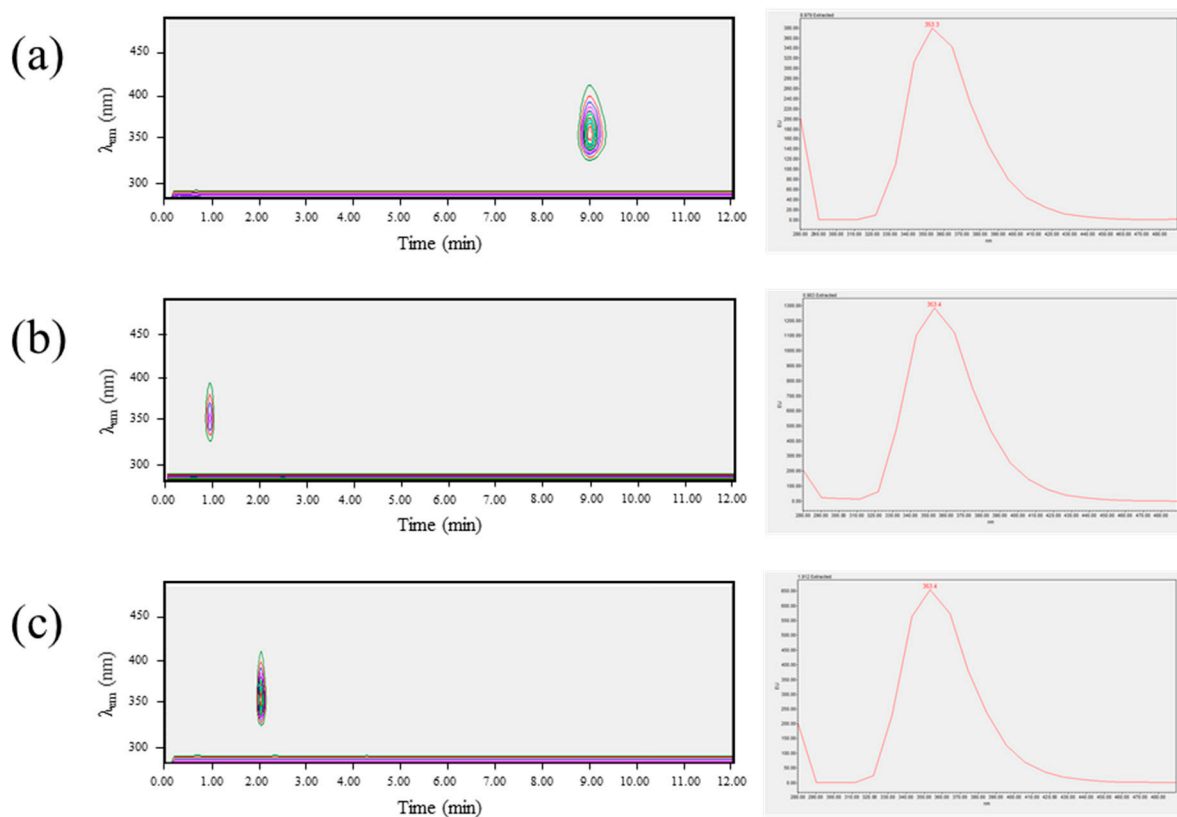

**Figure S3.** Three-dimensional scanning of  $\lambda_{em}$  with fixed  $\lambda_{ex}$  of 260 nm (left) and the optimum  $\lambda_{em}$  (right) for (a) 3,6-dimethylphenanthrene and (b) the first fractionated metabolic product (36DMPhe\_F1) and (c) the second fractionated metabolic product (36DMPhe\_F2).

6

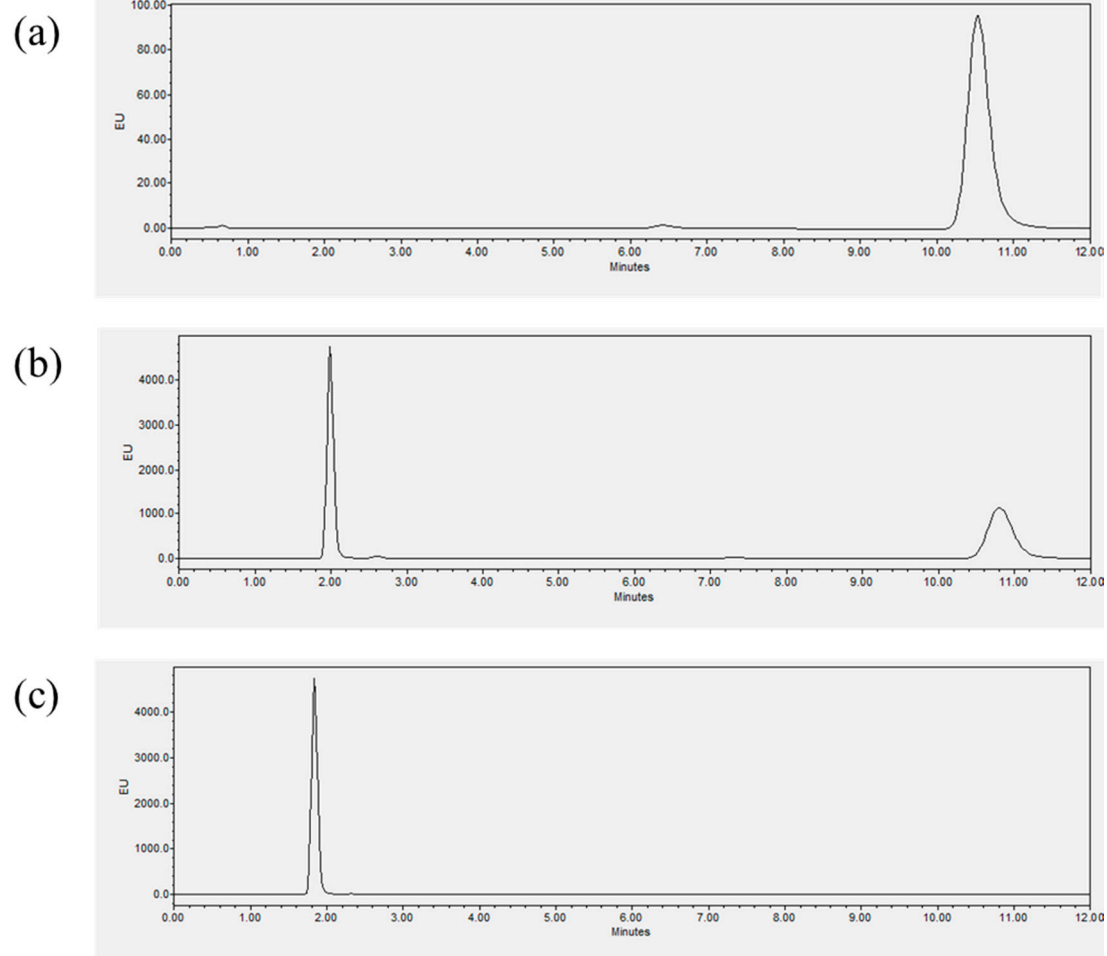

7

8 **Figure S4.** HPLC chromatograms of (a) 1-methylpyrene, (b) products of biodegradation, (c)  
9 the fractionated metabolic product (1MP\_F).

10

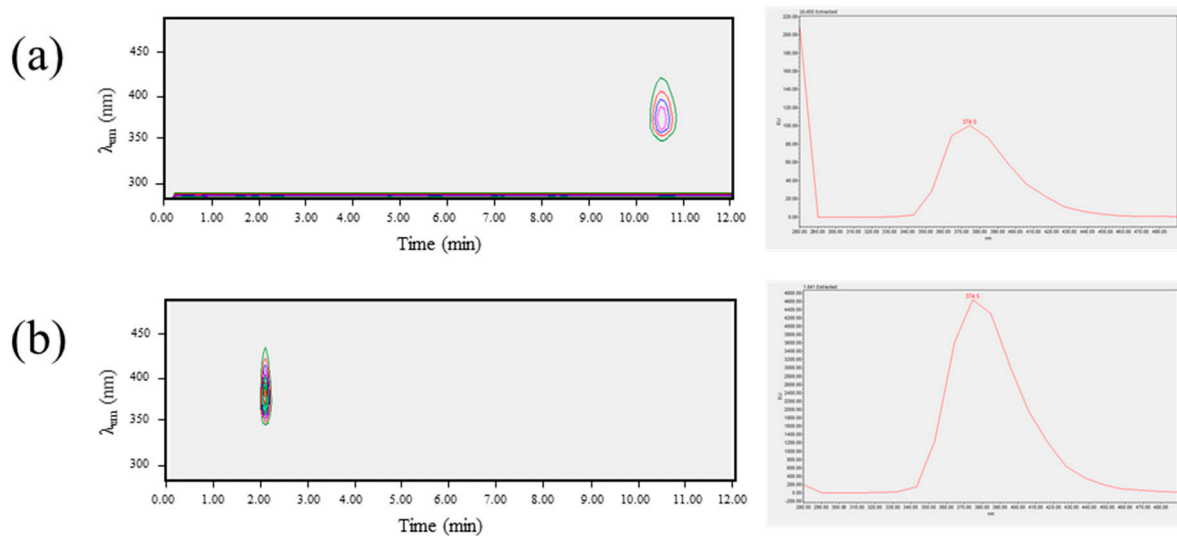

**Figure S5.** Three-dimensional scanning of  $\lambda_{em}$  with fixed  $\lambda_{ex}$  of 260 nm (left panel) and the optimum  $\lambda_{em}$  (right panel) for (a) 1-methylpyrene, (b) the fractionated metabolic product (1MP\_F).

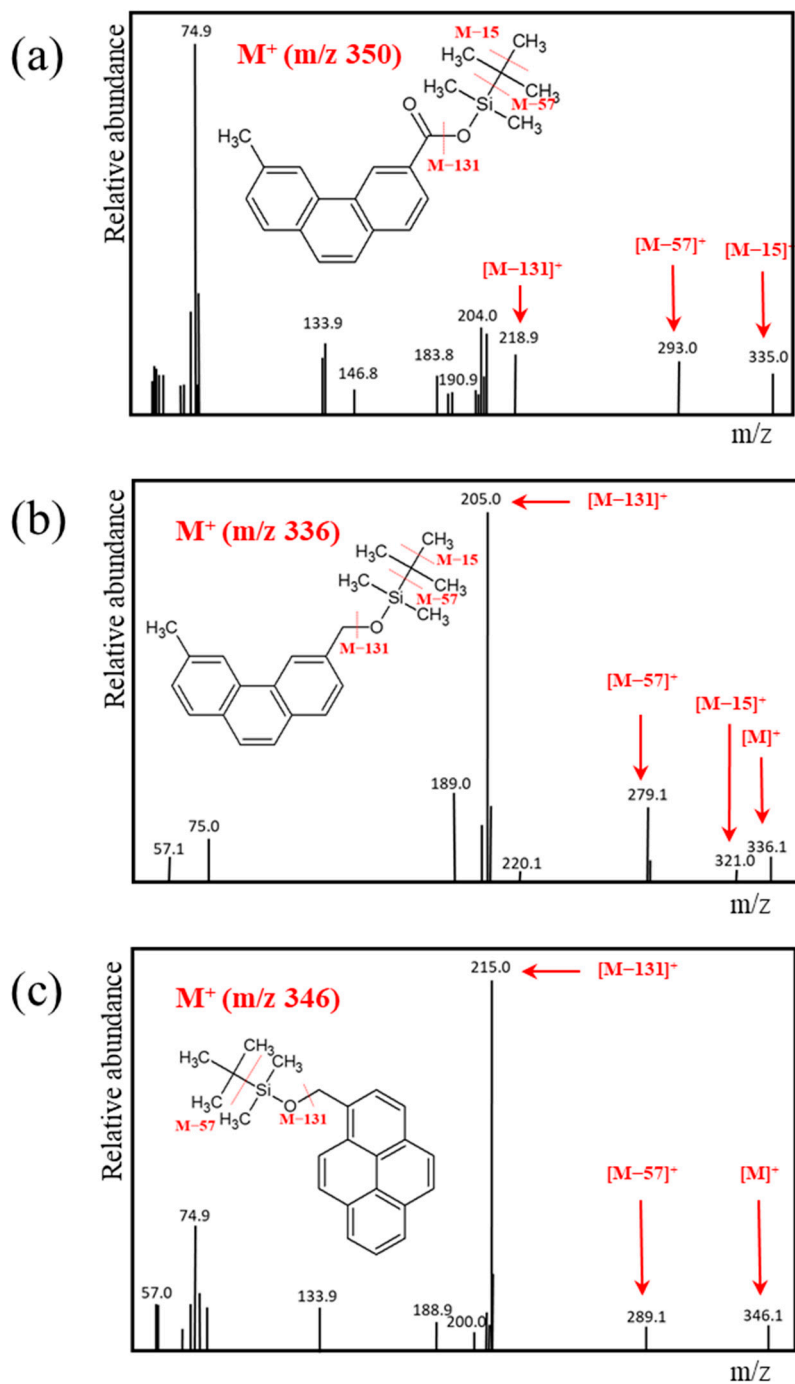

**Figure S6.** The mass fragmentation spectrum of the identified metabolic products of (a) 3,6DMPhe\_F1, (b) 3,6DMPhe\_F2, and (c) 1MP\_F with their derivatized structures.



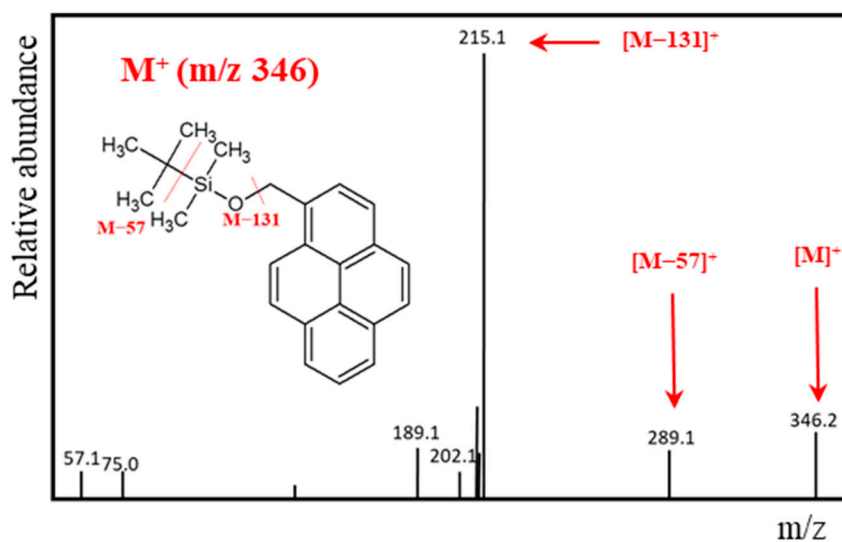

20

21 **Figure S7.** The mass fragmentation spectrum of an authentic standard of 1-pyrenemethanol

22 with the derivatized structure.

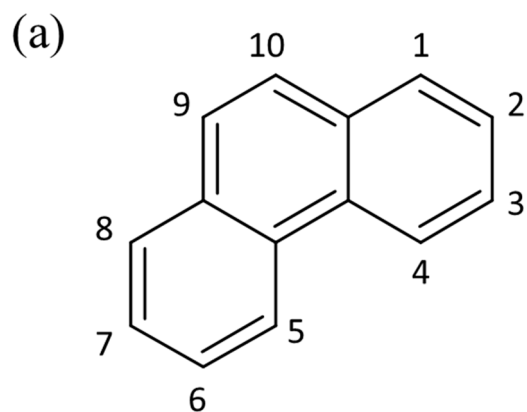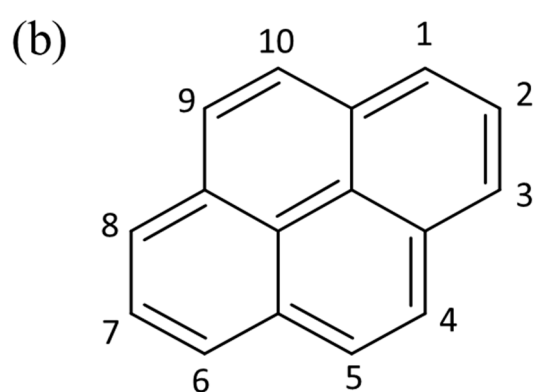

**Figure S8.** The chemical structures of (a) phenanthrene and (b) pyrene with their carbon numbering.
